# Supplementary material for: Assessment and treatment of floodwater in the Vietnamese Mekong Delta using a simple filter system based on silver nanoparticles coated onto activated carbon derived from rice husk
Source: Royal Society of Chemistry journal article supplement (doi:10.1039/d1ra06722b), 2021-01-01
Supplement: d1ra06722b1.pdf [file d1ra06722b1.pdf]

SUPPLEMENTARY DATA

**Evaluation and treatment of floodwater at Vietnamese Mekong Delta using  
a simple filter system based on the silver nanoparticles coated onto  
activated carbon derived from rice husk**

My Uyen Dao,<sup>a,b</sup> Hien Y Hoang<sup>c\*</sup>, Anh Khoa Tran,<sup>d</sup> and Hong Hanh Cong<sup>d</sup>

<sup>a</sup>Center for Advanced Chemistry, Institute of Research & Development, Duy Tan University, Danang, 550000, Vietnam

<sup>b</sup>Faculty of Natural Sciences, Duy Tan University, Danang, 550000, Vietnam

<sup>c</sup>Faculty of Environment, Ho Chi Minh City University of Natural Resources and Environment, Ho Chi Minh City, 70000, Vietnam

<sup>d</sup>Institute of materials science, Vietnam academy of science and technology, Hanoi, Vietnam

\*e-mail: hhy@hcmunre.edu.vn

**Table S1.** Comparison of water quality indicators of the floodwater before and after treatment with standard values recommended by the World Health Organization (WHO) and by the National Technical Regulation on Domestic Water Quality of Vietnam (QCVN 01: 2009/BYT).

| <b>Water quality indicators</b> | <b>Initial floodwater</b> | <b>Pre-treated floodwater</b> | <b>Post-treated floodwater</b> | <b>QCVN 01: 2009/BYT</b> | <b>WHO</b> |
|---------------------------------|---------------------------|-------------------------------|--------------------------------|--------------------------|------------|
| pH                              | 6.6 – 7.3                 | 6.90 – 6.95                   | 7.0 – 7.16                     | 6.5 – 8                  | 6.5 – 8    |
| Turbidity, NTU                  | 93 – 181                  | 6.00 – 10.9                   | 0.23 – 0.42                    | < 2                      | <5         |
| TDS, mg/L                       | 90 – 109                  | 88.33 – 77.33                 | 53.10 – 53.22                  | < 1000                   | <500       |
| SS, mg/L                        | 68 – 137                  | 0 – 15.76                     | 0                              | <25                      | <25        |
| Color, Pt-Co                    | 460 – 463                 | 31.76 – 115.67                | 0                              | <15                      | <15        |
| Total coliform, MPN/100mL       | 1500 – 25000              | 23300 – 23700                 | No detect                      | No detect                | No detect  |
| Fecal coliform, MPN/100mL       | 280 – 2800                | 1310 – 1487                   | No detect                      | No detect                | No detect  |

**Table S2.** The average estimated cost of chemicals to treat one cubic meter of floodwater using silver nanoparticles coated onto activated carbon

| Chemicals                                                    | Content | Cost, \$     |
|--------------------------------------------------------------|---------|--------------|
| AgNO <sub>3</sub>                                            | 0.085 g | 0.060        |
| C <sub>6</sub> H <sub>5</sub> O <sub>7</sub> Na <sub>3</sub> | 0.150 g | 0.011        |
| Rice husk                                                    | 150 g   | -            |
| N <sub>2</sub>                                               | 25 L    | 0.062        |
| CO <sub>2</sub>                                              | 12.5 L  | 0.009        |
| PAC                                                          | 20 g    | 0.007        |
| Quartz sand                                                  | 197.8 g | 0.018        |
| <b>Total</b>                                                 |         | <b>0.167</b> |

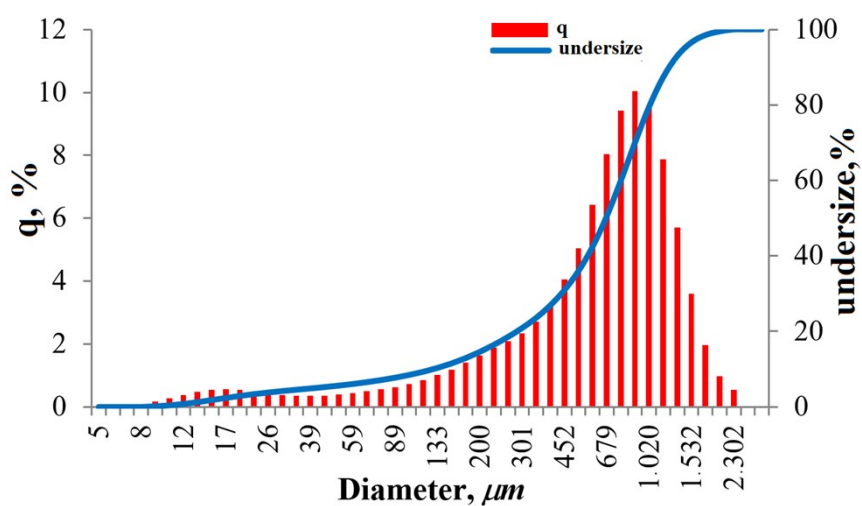

**Figure S1.** The particle size distribution of the obtained AC

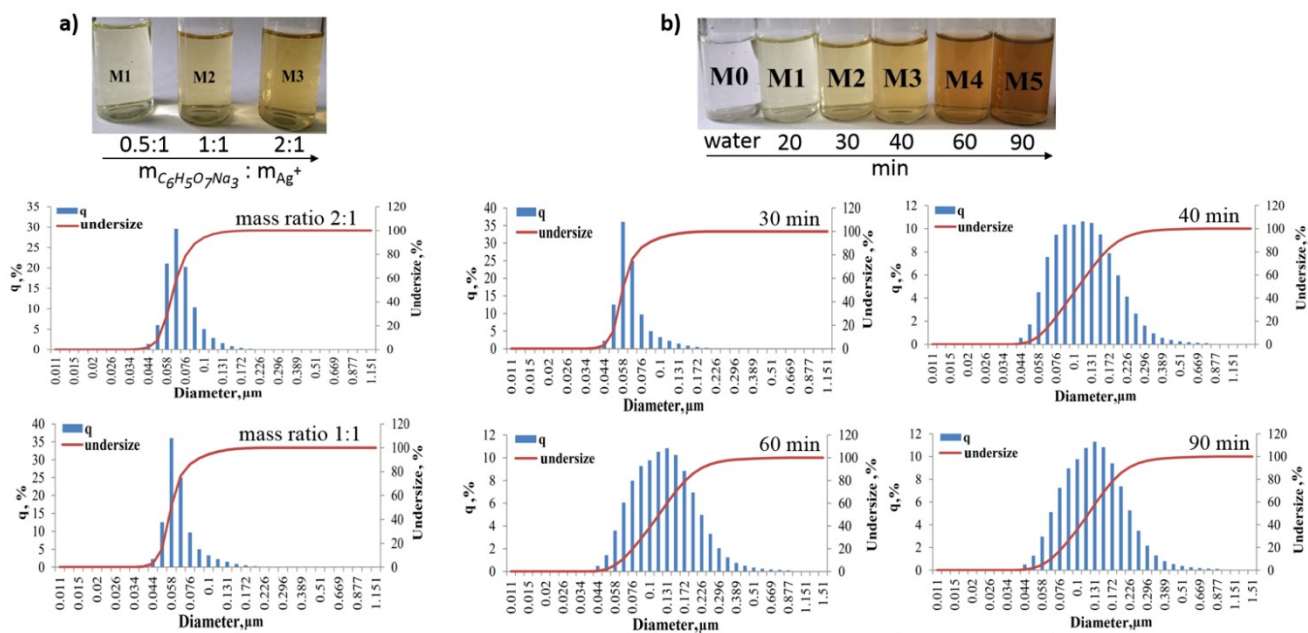

**Figure S2.** DLS size distribution histograms of silver nanoparticles synthesized with different reagent dosages (a) and reaction times (b)

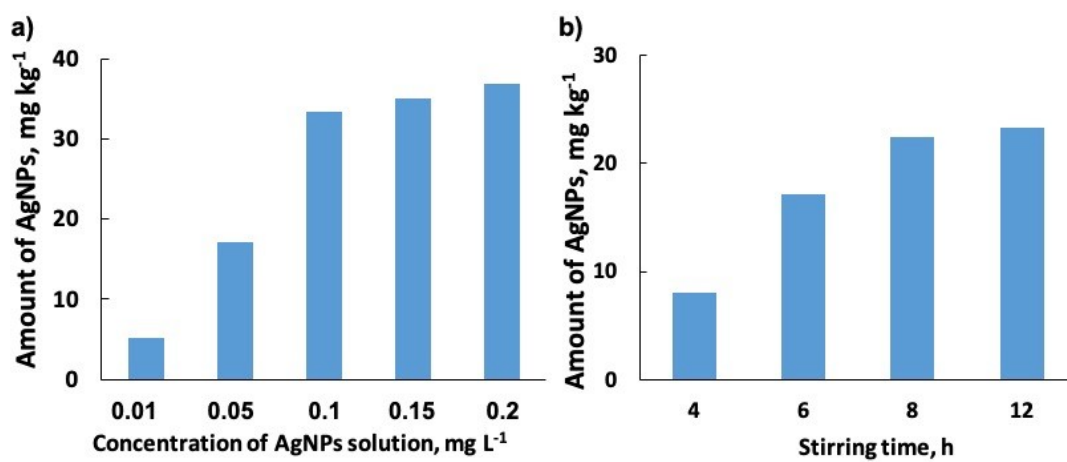

**Figure S3** Effect of AgNPs concentration (a) and stirring time (b) on AgNPs@AC formation

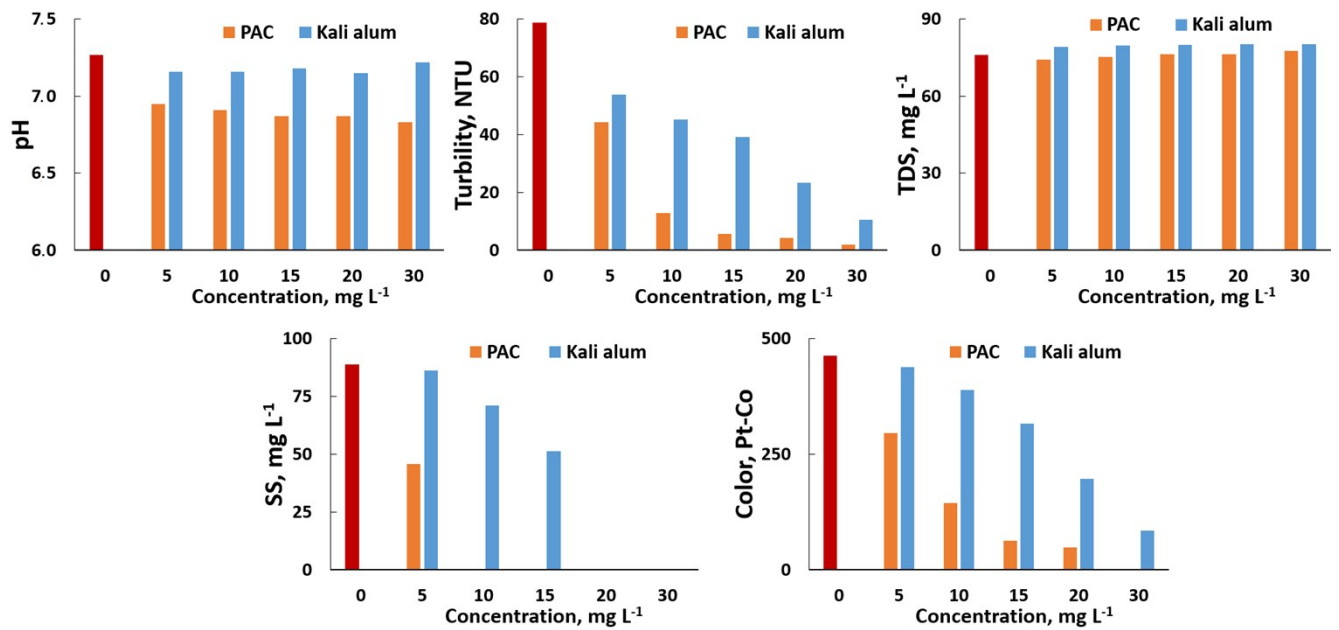

**Figure S4.** Floodwater quality indicators as functions of the coagulants concentrations at settling time of 10 min

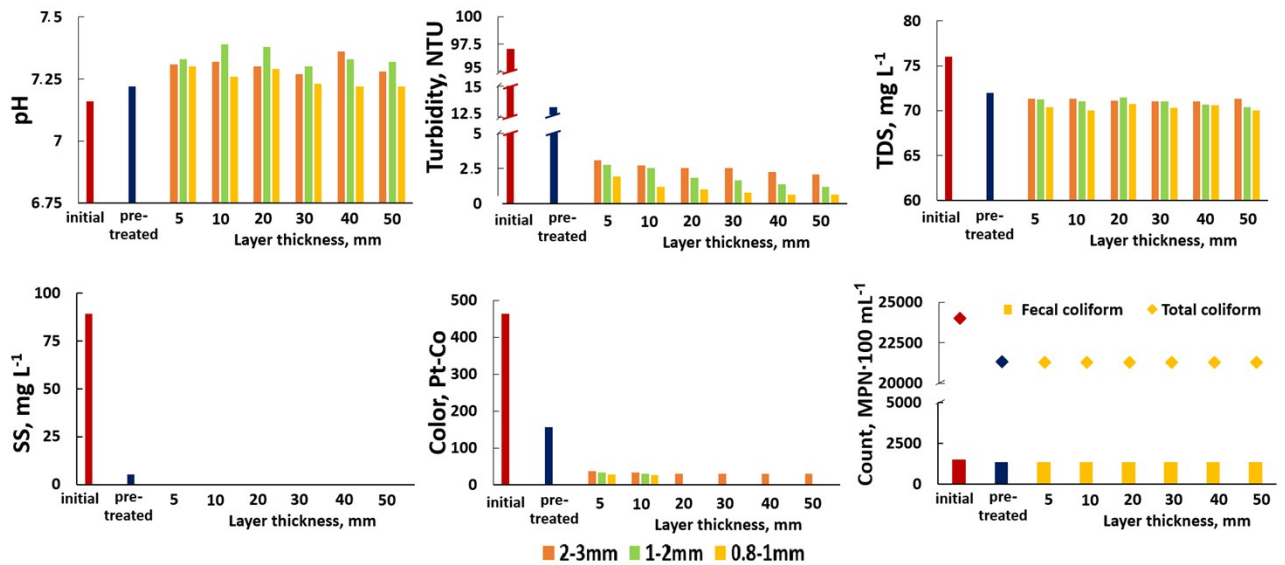

**Figure S5.** Floodwater quality indicators as functions of quartz sand layer thickness and particle size of quartz sand
